# Supplementary material for: Comprehensive transcriptome analyses reveal tomato plant responses to tobacco rattle virus-based gene silencing vectors
Source: PubMed Central journal article supplement (PMC5575331; doi:10.1038/s41598-017-10143-1), 2017-08-29
Supplement: 41598_2017_10143_MOESM2_ESM.pdf [file 41598_2017_10143_MOESM2_ESM.pdf]

# **Comprehensive transcriptome analyses reveal tomato plant responses to tobacco rattle virus-based gene silencing vectors**

Yi Zheng,<sup>1,5</sup> Biao Ding,<sup>2,6</sup> Zhangjun Fei,<sup>1,3,\*</sup> Ying Wang<sup>2,4,5,\*</sup>

<sup>1</sup> Boyce Thompson Institute, Cornell University, Ithaca, NY 14853, USA

<sup>2</sup> Department of Molecular Genetics, The Ohio State University, Columbus, OH 43210, USA

<sup>3</sup> USDA-ARS Robert W. Holley Center for Agriculture and Health, Ithaca, NY 14853, USA

<sup>4</sup> Department of Biological Sciences, Mississippi State University, Starkville, MS 39759, USA

<sup>5</sup> These authors contributed equally to this work.

<sup>6</sup> Deceased.

\* Correspondence should be addressed to Zhangjun Fei (zf25@cornell.edu) or Ying Wang (wang@biology.msstate.edu).

# Supplementary Data Set 1

## Figure 1

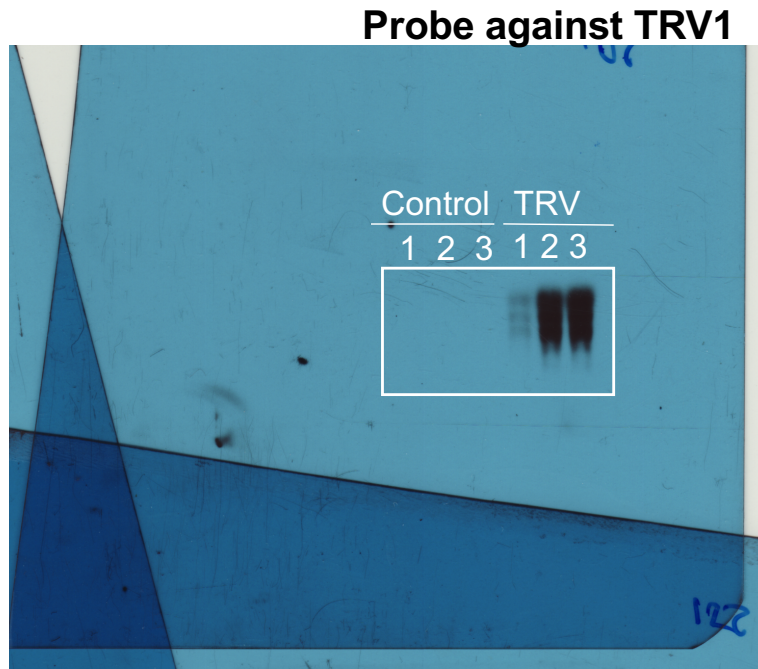

### Ethidium bromide staining of rRNAs

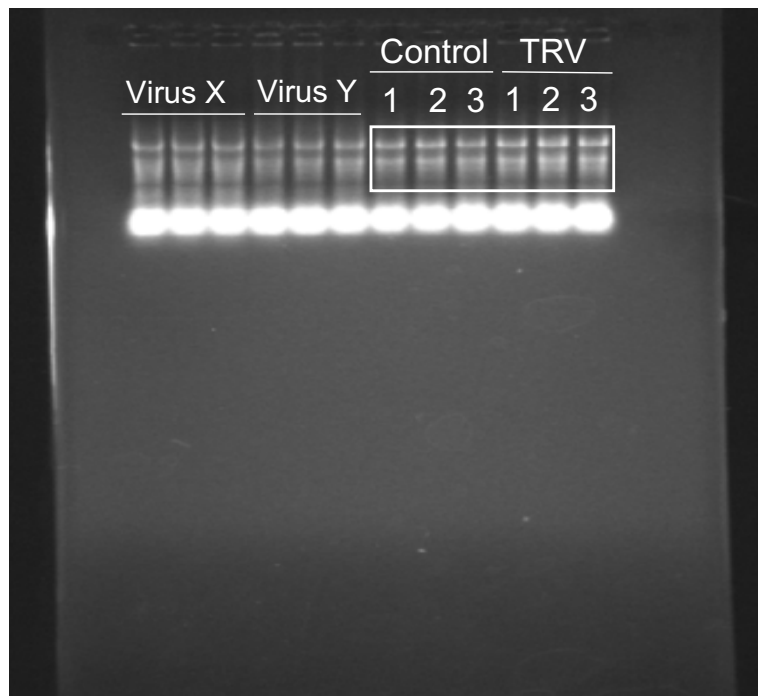

**Note:** The viruses X and Y samples in this gel were used for other projects.
